# Supplementary material for: Association Between Historical Neighborhood Redlining and Cardiovascular Outcomes Among US Veterans With Atherosclerotic Cardiovascular Diseases
Source: PubMed Central journal article supplement (PMC10336624; doi:10.1001/jamanetworkopen.2023.22727), 2023-07-11
Supplement: jamanetwopen-e2322727-s001.pdf [file jamanetwopen-e2322727-s001.pdf]

## Supplementary Online Content

Deo SV, Motairek I, Nasir K, et al. Association between historical neighborhood redlining and cardiovascular outcomes among US veterans with atherosclerotic cardiovascular diseases. *JAMA Netw Open*. 2023;6(7):e2322727.  
doi:10.1001/jamanetworkopen.2023.22727

**eFigure 1.** CONSORT Flow Diagram Presenting Cohort Selection

**eFigure 2.** Distribution of the Community Deprivation Index Across HOLC Graded Census Tracts

**eTable 1.** Baseline Characteristics Between Patients Included and Excluded From Our Cohort Study

**eTable 2.** Complete Case Analysis

**eTable 3.** The Association Between HOLC Grade and Cardiovascular Outcomes

**eTable 4.** Subgroup Analysis of MACE According to Race and Ethnicity

This supplementary material has been provided by the authors to give readers additional information about their work.

eFigure 1. CONSORT flow diagram presenting cohort selection.

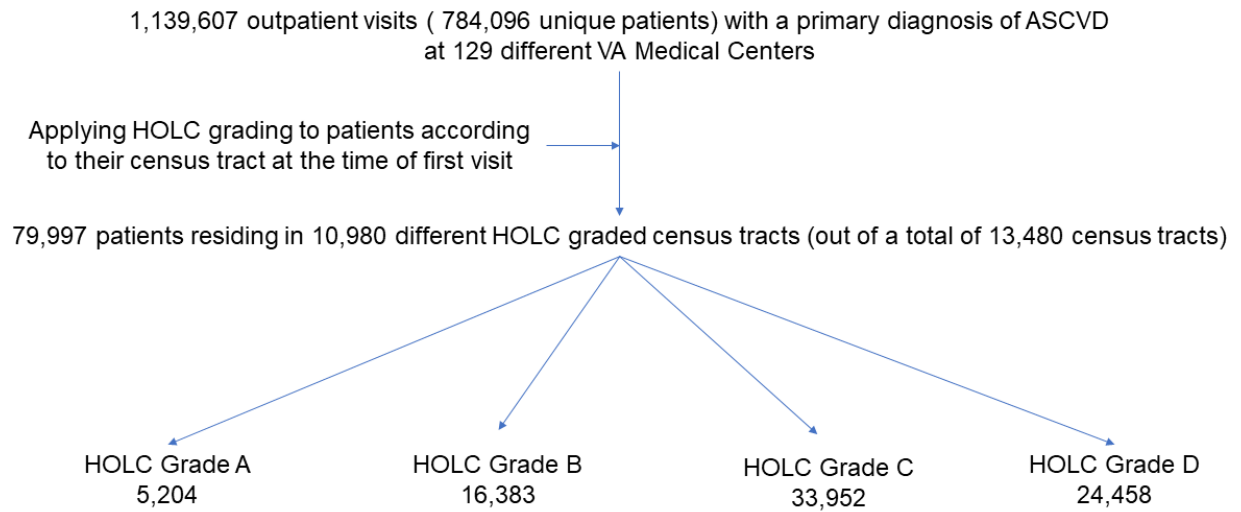

eFigure 2. Distribution of the community deprivation index across HOLC graded census tracts

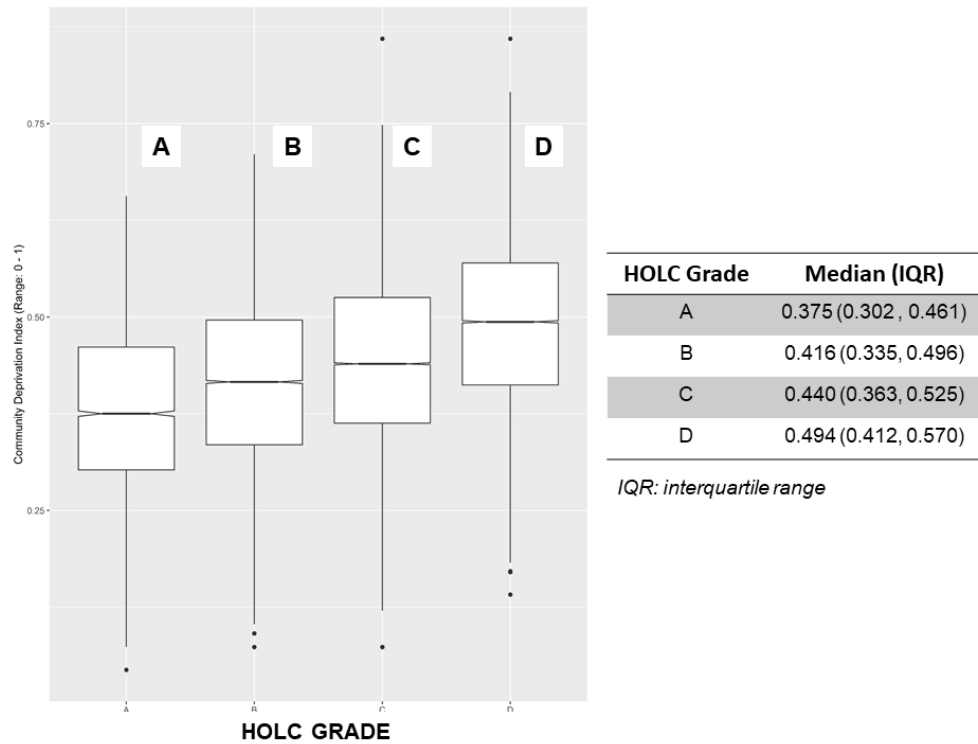

HOLC=Home Owner's Loan Corporation; IQR = interquartile range

eTable 1. Baseline Characteristics between patients included and excluded from our cohort study

|                                               | Included Patients<br>(n = 79,997) | Excluded Patients<br>(n = 704,099) |
|-----------------------------------------------|-----------------------------------|------------------------------------|
| Age (years)                                   | 74.46 (10.16)                     | 73.94 (9.89)                       |
| Female                                        | 2.9%                              | 4%                                 |
| Race                                          |                                   |                                    |
| Asian                                         | 0.6%                              | 0.5%                               |
| Black                                         | 37.3%                             | 8%                                 |
| Declined                                      | 4.2%                              | 4.3%                               |
| Native                                        | 1.1%                              | 1.5%                               |
| White                                         | 55.7%                             | 80.1%                              |
| Unknown                                       | 1.1%                              | 1.8%                               |
| Ethnicity                                     |                                   |                                    |
| Hispanic                                      | 5.4%                              | 4.6%                               |
| Not Hispanic                                  | 91.8%                             | 91.8%                              |
| Unknown                                       | 2.7%                              | 2.9%                               |
| Community deprivation index<br>(Range: 0 – 1) | 0.44 (0.11)                       | 0.50 (0.26)                        |
| Hypertension                                  | 83%                               | 83%                                |
| Diabetes                                      | 48%                               | 47%                                |

|                                             |                |                |
|---------------------------------------------|----------------|----------------|
| Heart Failure                               | 14.2%          | 12%            |
| Atrial Fibrillation                         | 16.6%          | 18.1%          |
| Chronic Obstructive Pulmonary Disease       | 21%            | 21.2%          |
| Prior Myocardial Infarction                 | 3%             | 3.4%           |
| Prior Percutaneous Coronary Intervention    | 2.6%           | 3%             |
| Systolic Blood Pressure (mmHg)              | 134.81 (20.79) | 133.40 (19.68) |
| Diastolic Blood Pressure (mmHg)             | 75.01 (11.93)  | 74.26 (11.12)  |
| Low-Density Lipoprotein Cholesterol (mg/dL) | 87.15 (34.56)  | 89.23 (38.01)  |

eTable 2. Complete case analysis

As a sensitivity analysis, we also fit the fully adjusted model as a complete case analysis without imputation. We observed that this did not change our primary findings using the imputed data sets.

| HOLC Grade (Ref: Grade A) | Hazard Ratio (95% Confidence interval) | p-value |
|---------------------------|----------------------------------------|---------|
| B                         | 0.96 (0.91, 1.01)                      | 0.18    |
| C                         | 0.98 (0.93, 1.03)                      | 0.50    |
| D                         | 1.06 (1.00, 1.12)                      | 0.02    |

HOLC=Home Owner's Loan Corporation

eTable 3. The association between HOLC grade and cardiovascular outcomes

|                                                  | Model 1                                                 | Model 2                                  | Model 3                                                          |
|--------------------------------------------------|---------------------------------------------------------|------------------------------------------|------------------------------------------------------------------|
|                                                  | Sub-distribution Hazard ratio (95% confidence interval) |                                          |                                                                  |
| Myocardial Infarction (Ref. category HOLC-A)     |                                                         |                                          |                                                                  |
| HOLC B                                           | 1.078 (0.950, 1.222), P=0.24                            | 1.043 (0.918, 1.184), P=0.51             | 0.980 (0.861,1.116); p = 0.76                                    |
| HOLC C                                           | 1.112 (0.987, 1.253), P=0.08                            | 1.058 (0.937, 1.194), P=0.35             | 0.966 (0.853,1.093); p = 0.58                                    |
| HOLC D                                           | <b>1.310 (1.161, 1.478), P&lt; 0.001</b>                | <b>1.230 (1.088, 1.391), P&lt; 0.001</b> | <b>1.148(1.011, 1.303); p = 0.03</b>                             |
| Stroke (Ref. category: HOLC-A)                   |                                                         |                                          |                                                                  |
| HOLC B                                           | 0.958 (0.623, 1.463), P=0.83                            | 0.867 (0.564, 1.330), P=0.51             | 0.793 (0.523,1.221; p = 0.30                                     |
| HOLC C                                           | 0.946 (0.630, 1.420), P=0.78                            | 0.842 (0.560, 1.265), P=0.4              | 0.754 (0.505, 1.128); p = 0.17                                   |
| HOLC D                                           | 1.089 (0.724, 1.638), P=0.68                            | 0.952 (0.632, 1.434), P=0.81             | 0.889 (0.584, 1.353); p = 0.58                                   |
| Major Adverse Limb Event (Ref. category: HOLC-A) |                                                         |                                          |                                                                  |
| HOLC B                                           | 1.013 (0.625, 1.640), P=0.95                            | 0.921 (0.563, 1.502), P=0.74             | Could not be reported as the regression model failed to converge |
| HOLC C                                           | 1.534 (0.982, 2.396), P=0.06                            | 1.376 (0.872, 2.168), P=0.16             |                                                                  |
| HOLC D                                           | 1.534 (0.977, 2.408), P=0.06                            | 1.328 (0.834, 2.113), P=0.23             |                                                                  |

*Model 1 = unadjusted; Model 2 = adjusted for age, sex, race, ethnicity; Model 3 = adjusted for age, sex, race, ethnicity, diabetes, COPD, hypertension, atrial fibrillation, heart failure, baseline LDL, prior MI, prior PCI, obesity, chronic kidney disease, and the community deprivation index*

HOLC=Home Owner’s Loan Corporation

eTable 4. Subgroup analysis of MACE according to race and ethnicity

| Subgroup     | HOLC Grade | HR                | p-value |
|--------------|------------|-------------------|---------|
| White        | B vs A     | 0.98 (0.92, 1.04) | 0.61    |
|              | C vs A     | 0.98 (0.93, 1.05) | 0.71    |
|              | D vs A     | 1.10 (1.03, 1.05) | 0.003   |
| Black        | B vs A     | 0.91 (0.82, 1.00) | 0.06    |
|              | C vs A     | 0.96 (0.87, 1.05) | 0.40    |
|              | D vs A     | 1.00 (0.91, 1.09) | 0.97    |
| Hispanic     | B vs A     | 0.83 (0.64, 1.09) | 0.18    |
|              | C vs A     | 0.88 (0.69, 1.13) | 0.33    |
|              | D vs A     | 1.01 (0.79, 1.29) | 0.88    |
| Not Hispanic | B vs A     | 0.97 (0.92, 1.02) | 0.24    |
|              | C vs A     | 0.98 (0.93, 1.03) | 0.49    |
|              | D vs A     | 1.05 (1.00, 1.10) | 0.04    |

HOLC=Home Owner's Loan Corporation; HR=hazard ratio
