# Supplementary material for: Association Between Historical Neighborhood Redlining and Cardiovascular Outcomes Among US Veterans With Atherosclerotic Cardiovascular Diseases
Source: PubMed Central journal article supplement (PMC10336624; doi:10.1001/jamanetworkopen.2023.22727), 2023-07-11
Supplement: jamanetwopen-e2322727-s002.pdf [file jamanetwopen-e2322727-s002.pdf]

## Data Sharing Statement

Deo. Association Between Historical Neighborhood Redlining and Cardiovascular Outcomes Among US Veterans With Atherosclerotic Cardiovascular Diseases. *JAMA Netw Open*. Published July 11, 2023. doi:10.1001/jamanetworkopen.2023.22727

### Data

**Data available:** No

### Additional Information

**Explanation for why data not available:** This study used VA data, which are restricted from being shared with outside investigatory by policy
